# Supplementary material for: Fatty Acid Profile and Desaturase Activities in 7–10-Year-Old Children Attending Primary School in Verona South District: Association between Palmitoleic Acid, SCD-16, Indices of Adiposity, and Blood Pressure
Source: MDPI journal article supplement (doi:10.3390/ijms21113899), 2020-05-30

**Supplementary Figure S1.** Participants flow-chart.

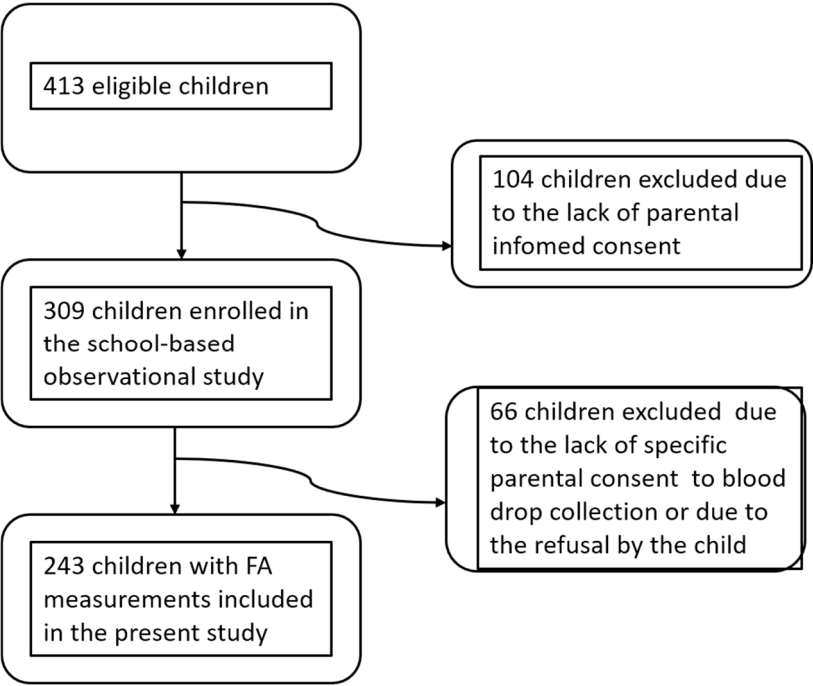

Supplement: s1 [file s1]
